# Supplementary material for: Re-evaluating the potential impact and cost-effectiveness of rotavirus vaccination in 73 Gavi countries: a modelling study
Source: PubMed Central journal article supplement (PMC7024955; doi:10.1016/s2214-109x(19)30439-5), 2019-11-07
Supplement: mmc1.pdf [file mmc1.pdf]

# THE LANCET

## Global Health

### Supplementary appendix

This appendix formed part of the original submission and has been peer reviewed. We post it as supplied by the authors.

Supplement to: Debellut F, Clark A, Pecenka C, et al. Re-evaluating the potential impact and cost-effectiveness of rotavirus vaccination in 73 Gavi countries: a modelling study. *Lancet Glob Health* 2019; **7**: e1664–74.

## Supplementary materials

### 1. Pre-vaccination disease event rates per 100,000 population per year among children under 5 years of age

|                                  | RVGE deaths* |     |      | Non-severe RVGE cases |       |        | Severe RVGE cases |       |       | Non-severe RVGE clinic visits |     |       | Severe RVGE clinic visits |       |       | Severe RVGE hospital admissions |     |       |
|----------------------------------|--------------|-----|------|-----------------------|-------|--------|-------------------|-------|-------|-------------------------------|-----|-------|---------------------------|-------|-------|---------------------------------|-----|-------|
|                                  | Mid          | Low | High | Mid                   | Low   | High   | Mid               | Low   | High  | Mid                           | Low | High  | Mid                       | Low   | High  | Mid                             | Low | High  |
| <b>All 73 countries</b>          |              |     |      |                       |       |        |                   |       |       |                               |     |       |                           |       |       |                                 |     |       |
| Median                           | 39           | 26  | 58   | 7,807                 | 5,583 | 10,907 | 2,193             | 1,417 | 3,093 | 718                           | 258 | 2,523 | 1,889                     | 1,234 | 2,641 | 378                             | 123 | 792   |
| Min                              | 0            | 0   | 1    | 6,837                 | 5,222 | 8,109  | 1,045             | 457   | 1,872 | 412                           | 149 | 1,386 | 988                       | 423   | 1,425 | 198                             | 42  | 427   |
| Max                              | 187          | 126 | 317  | 8,955                 | 6,543 | 12,128 | 3,163             | 1,778 | 5,891 | 887                           | 322 | 3,000 | 2,907                     | 1,742 | 4,715 | 581                             | 174 | 1,415 |
| Afghanistan                      | 59           | 38  | 93   | 8,020                 | 5,676 | 11,436 | 1,980             | 1,324 | 2,564 | 605                           | 214 | 2,156 | 1,493                     | 998   | 1,933 | 299                             | 100 | 580   |
| Angola                           | 159          | 97  | 259  | 7,414                 | 5,275 | 10,626 | 2,586             | 1,725 | 3,374 | 629                           | 224 | 2,253 | 2,193                     | 1,463 | 2,861 | 439                             | 146 | 858   |
| Armenia                          | 1            | 1   | 2    | 8,868                 | 6,435 | 11,933 | 1,132             | 565   | 2,067 | 866                           | 314 | 2,912 | 1,105                     | 552   | 2,018 | 221                             | 55  | 605   |
| Azerbaijan                       | 8            | 3   | 24   | 8,955                 | 6,543 | 11,823 | 1,045             | 457   | 2,177 | 847                           | 309 | 2,796 | 988                       | 432   | 2,060 | 198                             | 43  | 618   |
| Bangladesh                       | 13           | 9   | 17   | 8,196                 | 5,898 | 11,431 | 1,804             | 1,102 | 2,569 | 805                           | 290 | 2,806 | 1,772                     | 1,082 | 2,523 | 354                             | 108 | 757   |
| Benin                            | 83           | 76  | 91   | 7,353                 | 5,258 | 10,499 | 2,647             | 1,742 | 3,501 | 637                           | 228 | 2,273 | 2,292                     | 1,508 | 3,032 | 458                             | 151 | 910   |
| Bhutan                           | 7            | 2   | 20   | 8,498                 | 6,059 | 11,915 | 1,502             | 941   | 2,085 | 824                           | 294 | 2,889 | 1,457                     | 913   | 2,023 | 291                             | 91  | 607   |
| Bolivia                          | 20           | 10  | 41   | 8,240                 | 5,956 | 11,358 | 1,760             | 1,044 | 2,642 | 806                           | 291 | 2,777 | 1,721                     | 1,021 | 2,584 | 344                             | 102 | 775   |
| Burkina Faso                     | 81           | 48  | 136  | 6,970                 | 5,411 | 8,973  | 3,030             | 1,589 | 5,027 | 654                           | 254 | 2,104 | 2,842                     | 1,491 | 4,715 | 568                             | 149 | 1,415 |
| Burundi                          | 74           | 61  | 90   | 7,549                 | 5,325 | 10,879 | 2,451             | 1,675 | 3,121 | 743                           | 262 | 2,676 | 2,411                     | 1,648 | 3,071 | 482                             | 165 | 921   |
| Cambodia                         | 14           | 9   | 21   | 7,819                 | 5,564 | 11,198 | 2,181             | 1,436 | 2,802 | 726                           | 258 | 2,598 | 2,024                     | 1,333 | 2,600 | 405                             | 133 | 780   |
| Cameroon                         | 96           | 74  | 124  | 7,131                 | 5,355 | 9,644  | 2,869             | 1,645 | 4,356 | 662                           | 248 | 2,237 | 2,663                     | 1,527 | 4,043 | 533                             | 153 | 1,213 |
| Central African Republic         | 155          | 75  | 317  | 7,181                 | 5,310 | 9,906  | 2,819             | 1,690 | 4,094 | 444                           | 164 | 1,531 | 1,742                     | 1,044 | 2,530 | 348                             | 104 | 759   |
| Chad                             | 187          | 126 | 276  | 7,324                 | 5,235 | 10,470 | 2,676             | 1,765 | 3,530 | 417                           | 149 | 1,492 | 1,525                     | 1,006 | 2,012 | 305                             | 101 | 604   |
| Comoros                          | 37           | 31  | 45   | 7,494                 | 5,224 | 10,921 | 2,506             | 1,776 | 3,079 | 670                           | 234 | 2,441 | 2,241                     | 1,587 | 2,753 | 448                             | 159 | 826   |
| Congo                            | 39           | 18  | 85   | 7,222                 | 5,370 | 9,880  | 2,778             | 1,630 | 4,120 | 657                           | 244 | 2,248 | 2,528                     | 1,484 | 3,749 | 506                             | 148 | 1,125 |
| Côte d'Ivoire                    | 59           | 48  | 72   | 7,536                 | 5,274 | 10,939 | 2,464             | 1,726 | 3,061 | 671                           | 235 | 2,434 | 2,193                     | 1,536 | 2,725 | 439                             | 154 | 817   |
| Cuba                             | 0            | 0   | 1    | 8,150                 | 5,695 | 11,665 | 1,850             | 1,305 | 2,335 | 815                           | 285 | 2,916 | 1,850                     | 1,305 | 2,335 | 370                             | 131 | 701   |
| Dem. People's Republic of Korea  | 9            | 7   | 12   | 8,306                 | 5,833 | 11,861 | 1,694             | 1,167 | 2,139 | 787                           | 276 | 2,811 | 1,606                     | 1,107 | 2,027 | 321                             | 111 | 608   |
| Democratic Republic of the Congo | 90           | 70  | 117  | 6,837                 | 5,521 | 8,109  | 3,163             | 1,479 | 5,891 | 543                           | 219 | 1,610 | 2,512                     | 1,174 | 4,677 | 502                             | 117 | 1,403 |
| Djibouti                         | 34           | 25  | 45   | 8,071                 | 5,700 | 11,522 | 1,929             | 1,300 | 2,478 | 717                           | 253 | 2,558 | 1,713                     | 1,154 | 2,201 | 343                             | 115 | 660   |
| Eritrea                          | 45           | 26  | 78   | 7,585                 | 5,313 | 10,991 | 2,415             | 1,687 | 3,009 | 737                           | 258 | 2,671 | 2,347                     | 1,640 | 2,925 | 469                             | 164 | 877   |
| Ethiopia                         | 44           | 37  | 53   | 7,818                 | 5,759 | 10,659 | 2,182             | 1,241 | 3,341 | 639                           | 236 | 2,180 | 1,785                     | 1,015 | 2,733 | 357                             | 102 | 820   |
| Gambia                           | 36           | 14  | 96   | 8,220                 | 6,335 | 9,850  | 1,780             | 665   | 4,150 | 812                           | 313 | 2,433 | 1,759                     | 657   | 4,100 | 352                             | 66  | 1,230 |
| Georgia                          | 1            | 1   | 1    | 8,874                 | 6,442 | 11,927 | 1,126             | 558   | 2,073 | 887                           | 322 | 2,982 | 1,126                     | 558   | 2,073 | 225                             | 56  | 622   |
| Ghana                            | 43           | 33  | 56   | 7,022                 | 5,411 | 9,141  | 2,978             | 1,589 | 4,859 | 667                           | 257 | 2,171 | 2,830                     | 1,510 | 4,616 | 566                             | 151 | 1,385 |
| Guinea                           | 60           | 59  | 62   | 7,360                 | 5,261 | 10,510 | 2,640             | 1,739 | 3,490 | 551                           | 197 | 1,965 | 1,975                     | 1,300 | 2,610 | 395                             | 130 | 783   |
| Guinea-Bissau                    | 81           | 56  | 118  | 7,254                 | 5,321 | 10,090 | 2,746             | 1,679 | 3,910 | 688                           | 252 | 2,391 | 2,603                     | 1,592 | 3,707 | 521                             | 159 | 1,112 |
| Guyana                           | 17           | 14  | 20   | 7,982                 | 5,692 | 11,226 | 2,018             | 1,308 | 2,774 | 785                           | 280 | 2,762 | 1,986                     | 1,287 | 2,730 | 397                             | 129 | 819   |
| Haiti                            | 48           | 37  | 63   | 8,549                 | 6,364 | 11,054 | 1,451             | 636   | 2,946 | 718                           | 267 | 2,321 | 1,219                     | 535   | 2,475 | 244                             | 53  | 742   |

|                                  |     |    |     |       |       |        |       |       |       |     |     |       |       |       |       |     |     |       |
|----------------------------------|-----|----|-----|-------|-------|--------|-------|-------|-------|-----|-----|-------|-------|-------|-------|-----|-----|-------|
| Honduras                         | 11  | 9  | 14  | 8,128 | 5,737 | 11,530 | 1,872 | 1,263 | 2,470 | 805 | 284 | 2,854 | 1,853 | 1,251 | 2,445 | 371 | 125 | 734   |
| India                            | 29  | 27 | 32  | 8,393 | 5,889 | 11,979 | 1,607 | 1,111 | 2,021 | 745 | 261 | 2,659 | 1,427 | 987   | 1,795 | 285 | 99  | 538   |
| Indonesia                        | 17  | 10 | 30  | 7,817 | 5,825 | 10,474 | 2,183 | 1,175 | 3,526 | 755 | 281 | 2,530 | 2,108 | 1,135 | 3,406 | 422 | 113 | 1,022 |
| Kenya                            | 33  | 25 | 44  | 7,751 | 5,628 | 10,791 | 2,249 | 1,372 | 3,209 | 746 | 271 | 2,595 | 2,164 | 1,320 | 3,087 | 433 | 132 | 926   |
| Kiribati                         | 29  | 16 | 53  | 8,369 | 6,019 | 11,704 | 1,631 | 981   | 2,296 | 783 | 282 | 2,739 | 1,527 | 918   | 2,149 | 305 | 92  | 645   |
| Kyrgyzstan                       | 6   | 4  | 9   | 8,722 | 6,204 | 12,128 | 1,278 | 796   | 1,872 | 848 | 302 | 2,947 | 1,242 | 774   | 1,820 | 248 | 77  | 546   |
| Lao People's Democratic Republic | 74  | 70 | 78  | 7,701 | 5,578 | 10,856 | 2,299 | 1,422 | 3,144 | 668 | 242 | 2,356 | 1,995 | 1,234 | 2,729 | 399 | 123 | 819   |
| Lesotho                          | 64  | 57 | 71  | 7,713 | 5,583 | 10,786 | 2,287 | 1,417 | 3,214 | 753 | 272 | 2,632 | 2,233 | 1,383 | 3,137 | 447 | 138 | 941   |
| Liberia                          | 52  | 40 | 67  | 7,484 | 5,228 | 10,888 | 2,516 | 1,772 | 3,112 | 642 | 224 | 2,336 | 2,159 | 1,520 | 2,670 | 432 | 152 | 801   |
| Madagascar                       | 55  | 28 | 110 | 7,658 | 5,456 | 10,907 | 2,342 | 1,544 | 3,093 | 614 | 219 | 2,187 | 1,879 | 1,238 | 2,481 | 376 | 124 | 744   |
| Malawi                           | 49  | 39 | 61  | 7,412 | 5,223 | 10,719 | 2,588 | 1,777 | 3,281 | 722 | 254 | 2,610 | 2,520 | 1,731 | 3,196 | 504 | 173 | 959   |
| Mali                             | 64  | 29 | 139 | 8,157 | 6,290 | 9,835  | 1,843 | 710   | 4,165 | 684 | 264 | 2,060 | 1,545 | 595   | 3,490 | 309 | 60  | 1,047 |
| Mauritania                       | 63  | 50 | 79  | 7,394 | 5,230 | 10,659 | 2,606 | 1,770 | 3,341 | 667 | 236 | 2,404 | 2,351 | 1,597 | 3,013 | 470 | 160 | 904   |
| Mongolia                         | 7   | 4  | 15  | 8,085 | 5,841 | 11,321 | 1,915 | 1,159 | 2,679 | 797 | 288 | 2,791 | 1,889 | 1,143 | 2,641 | 378 | 114 | 792   |
| Mozambique                       | 47  | 36 | 62  | 7,473 | 5,224 | 10,870 | 2,527 | 1,776 | 3,130 | 685 | 239 | 2,489 | 2,315 | 1,627 | 2,867 | 463 | 163 | 860   |
| Myanmar                          | 27  | 20 | 36  | 7,807 | 5,824 | 10,444 | 2,193 | 1,176 | 3,556 | 706 | 263 | 2,360 | 1,982 | 1,063 | 3,215 | 396 | 106 | 965   |
| Nepal                            | 10  | 6  | 17  | 8,604 | 6,243 | 11,760 | 1,396 | 757   | 2,240 | 790 | 287 | 2,699 | 1,282 | 695   | 2,056 | 256 | 69  | 617   |
| Nicaragua                        | 16  | 10 | 24  | 8,110 | 5,747 | 11,461 | 1,890 | 1,253 | 2,539 | 803 | 284 | 2,837 | 1,871 | 1,241 | 2,513 | 374 | 124 | 754   |
| Niger                            | 115 | 74 | 176 | 7,388 | 5,225 | 10,655 | 2,612 | 1,775 | 3,345 | 638 | 226 | 2,302 | 2,257 | 1,534 | 2,890 | 451 | 153 | 867   |
| Nigeria                          | 109 | 69 | 172 | 7,125 | 5,367 | 9,593  | 2,875 | 1,633 | 4,407 | 412 | 155 | 1,386 | 1,662 | 944   | 2,547 | 332 | 94  | 764   |
| Pakistan                         | 33  | 14 | 77  | 8,642 | 6,483 | 10,916 | 1,358 | 517   | 3,084 | 707 | 265 | 2,232 | 1,111 | 423   | 2,522 | 222 | 42  | 757   |
| Papua New Guinea                 | 30  | 26 | 34  | 8,399 | 6,059 | 11,696 | 1,601 | 941   | 2,304 | 711 | 256 | 2,474 | 1,354 | 796   | 1,949 | 271 | 80  | 585   |
| Republic of Moldova              | 1   | 1  | 1   | 8,453 | 5,995 | 11,829 | 1,547 | 1,005 | 2,171 | 805 | 285 | 2,815 | 1,473 | 957   | 2,067 | 295 | 96  | 620   |
| Rwanda                           | 44  | 21 | 90  | 7,052 | 5,415 | 9,225  | 2,948 | 1,585 | 4,775 | 695 | 267 | 2,274 | 2,907 | 1,562 | 4,708 | 581 | 156 | 1,412 |
| Sao Tome and Principe            | 20  | 12 | 32  | 7,552 | 5,226 | 11,060 | 2,448 | 1,774 | 2,940 | 742 | 257 | 2,715 | 2,404 | 1,742 | 2,887 | 481 | 174 | 866   |
| Senegal                          | 39  | 29 | 53  | 7,575 | 5,274 | 11,035 | 2,425 | 1,726 | 2,965 | 726 | 253 | 2,643 | 2,323 | 1,654 | 2,840 | 465 | 165 | 852   |
| Sierra Leone                     | 101 | 80 | 129 | 7,365 | 5,222 | 10,600 | 2,635 | 1,778 | 3,400 | 701 | 249 | 2,523 | 2,508 | 1,692 | 3,237 | 502 | 169 | 971   |
| Solomon Islands                  | 11  | 7  | 20  | 8,343 | 5,988 | 11,706 | 1,657 | 1,012 | 2,294 | 816 | 293 | 2,862 | 1,620 | 990   | 2,244 | 324 | 99  | 673   |
| Somalia                          | 114 | 77 | 168 | 7,969 | 5,682 | 11,292 | 2,031 | 1,318 | 2,708 | 419 | 149 | 1,485 | 1,068 | 693   | 1,425 | 214 | 69  | 427   |
| South Sudan                      | 82  | 42 | 162 | 7,487 | 5,228 | 10,898 | 2,513 | 1,772 | 3,102 | 479 | 167 | 1,744 | 1,609 | 1,134 | 1,986 | 322 | 113 | 596   |
| Sri Lanka                        | 1   | 0  | 2   | 8,491 | 6,018 | 11,983 | 1,509 | 982   | 2,017 | 849 | 301 | 2,996 | 1,509 | 982   | 2,017 | 302 | 98  | 605   |
| Sudan                            | 60  | 45 | 81  | 8,185 | 5,924 | 11,351 | 1,815 | 1,076 | 2,649 | 799 | 289 | 2,770 | 1,771 | 1,050 | 2,585 | 354 | 105 | 776   |
| Tajikistan                       | 31  | 20 | 47  | 8,544 | 6,053 | 11,959 | 1,456 | 947   | 2,041 | 829 | 294 | 2,900 | 1,412 | 919   | 1,980 | 282 | 92  | 594   |
| Timor-Leste                      | 35  | 17 | 69  | 7,972 | 5,862 | 10,855 | 2,028 | 1,138 | 3,145 | 639 | 235 | 2,176 | 1,627 | 912   | 2,522 | 325 | 91  | 757   |
| Togo                             | 66  | 42 | 104 | 7,117 | 5,377 | 9,541  | 2,883 | 1,623 | 4,459 | 669 | 253 | 2,242 | 2,710 | 1,526 | 4,191 | 542 | 153 | 1,257 |
| Uganda                           | 32  | 31 | 34  | 7,442 | 5,268 | 10,711 | 2,558 | 1,732 | 3,289 | 662 | 234 | 2,383 | 2,277 | 1,542 | 2,927 | 455 | 154 | 878   |
| Ukraine                          | 1   | 0  | 2   | 8,412 | 5,860 | 11,983 | 1,588 | 1,140 | 2,017 | 841 | 293 | 2,996 | 1,588 | 1,140 | 2,017 | 318 | 114 | 605   |
| United Republic of Tanzania      | 29  | 20 | 44  | 7,648 | 5,462 | 10,870 | 2,352 | 1,538 | 3,130 | 751 | 268 | 2,669 | 2,310 | 1,511 | 3,074 | 462 | 151 | 922   |
| Uzbekistan                       | 7   | 1  | 40  | 8,678 | 6,151 | 12,123 | 1,322 | 849   | 1,877 | 859 | 304 | 3,000 | 1,308 | 840   | 1,858 | 262 | 84  | 558   |
| Viet Nam                         | 5   | 1  | 31  | 7,832 | 5,564 | 11,231 | 2,168 | 1,436 | 2,769 | 732 | 260 | 2,622 | 2,025 | 1,341 | 2,586 | 405 | 134 | 776   |
| Yemen                            | 43  | 21 | 90  | 7,906 | 5,699 | 11,085 | 2,094 | 1,301 | 2,915 | 639 | 230 | 2,239 | 1,692 | 1,051 | 2,355 | 338 | 105 | 706   |
| Zambia                           | 51  | 46 | 58  | 7,445 | 5,227 | 10,795 | 2,555 | 1,773 | 3,205 | 666 | 234 | 2,413 | 2,284 | 1,585 | 2,865 | 457 | 159 | 859   |
| Zimbabwe                         | 54  | 46 | 63  | 7,433 | 5,228 | 10,763 | 2,567 | 1,772 | 3,237 | 727 | 256 | 2,632 | 2,511 | 1,733 | 3,166 | 502 | 173 | 950   |

\* Mortality rates reflect year 2015 without rotavirus vaccination. These rates are assumed to decline overtime in the absence of vaccination (consistent with overall under-5 mortality declines).

## 2. Additional data inputs and sources used to model vaccine program costs

|                                                                                 | Base case | Low  | High   | Source     |
|---------------------------------------------------------------------------------|-----------|------|--------|------------|
| International handling<br>(% of vaccine price)                                  | 3.5%      | 1.4% | 5%     | [46]       |
| International transportation<br>(% of vaccine price)                            | 6%        | 2%   | 15%    | Assumption |
| Incremental delivery cost per dose for low-income countries                     | \$1.25    | \$1  | \$2.50 | [45]       |
| Incremental delivery cost per dose for lower- and upper-middle income countries | \$1.86    | \$1  | \$2.50 | [45]       |
| Vaccine wastage rate                                                            |           |      |        |            |
| ROTARIX                                                                         | 5%        | 1%   | 10%    |            |
| RotaTeq                                                                         | 5%        | 1%   | 10%    |            |
| ROTAVAC                                                                         | 25%       | 10%  | 50%    | [41]       |
| ROTASIL                                                                         | 10%       | 5%   | 15%    |            |
| Safe disposal bag (100 doses capacity)                                          | \$0.8     | -    | -      |            |

## 3. Additional parameters to model burden of disease

|                                                | Base case | Low   | High  | Source |
|------------------------------------------------|-----------|-------|-------|--------|
| <b>Disability weights for DALY calculation</b> |           |       |       |        |
| Rotavirus (non-severe) case                    | 0.188     | 0.125 | 0.264 |        |
| Rotavirus severe case                          | 0.247     | 0.164 | 0.348 | [36]   |
| <b>Mean duration of illness (in days)</b>      |           |       |       |        |
| Rotavirus (non-severe) case                    | 4         | 3     | 7     |        |
| Rotavirus severe case                          | 6         | 3     | 7     | [37]   |

## 4. Modeled rotavirus treatment costs for 73 countries (in 2015 US\$)

|                                  | Average cost per clinic visit |                |                    |          | Average cost per hospital admission |                |                    |          |
|----------------------------------|-------------------------------|----------------|--------------------|----------|-------------------------------------|----------------|--------------------|----------|
|                                  | Total                         | Direct Medical | Direct Non-Medical | Indirect | Total                               | Direct Medical | Direct Non-Medical | Indirect |
| <b>All 73 countries</b>          |                               |                |                    |          |                                     |                |                    |          |
| Mean                             | 16.81                         | 6.71           | 9.02               | 1.08     | 90.68                               | 71.59          | 14.75              | 4.34     |
| Median                           | 13.24                         | 5.36           | 7.21               | 0.83     | 46.70                               | 36.07          | 7.43               | 3.32     |
| Min                              | 9.56                          | 4.00           | 5.38               | 0.19     | 16.64                               | 13.17          | 2.71               | 0.76     |
| Max                              | 44.77                         | 16.86          | 22.67              | 5.24     | 337.52                              | 262.48         | 54.08              | 20.96    |
| <hr/>                            |                               |                |                    |          |                                     |                |                    |          |
| Afghanistan                      | 10.06                         | 4.12           | 5.54               | 0.41     | 19.21                               | 14.58          | 3.00               | 1.63     |
| Angola                           | 29.48                         | 11.37          | 15.30              | 2.81     | 224.48                              | 176.81         | 36.43              | 11.24    |
| Armenia                          | 25.61                         | 9.90           | 13.32              | 2.39     | 185.62                              | 145.98         | 30.08              | 9.56     |
| Azerbaijan                       | 30.40                         | 11.36          | 15.28              | 3.77     | 268.94                              | 210.51         | 43.37              | 15.06    |
| Bangladesh                       | 12.26                         | 4.87           | 6.56               | 0.83     | 37.03                               | 27.95          | 5.76               | 3.32     |
| Benin                            | 12.83                         | 5.25           | 7.06               | 0.52     | 41.44                               | 32.63          | 6.72               | 2.09     |
| Bhutan                           | 20.39                         | 7.92           | 10.65              | 1.82     | 131.33                              | 102.86         | 21.19              | 7.28     |
| Bolivia (Plurinational State of) | 27.63                         | 10.88          | 14.64              | 2.11     | 246.17                              | 197.12         | 40.62              | 8.43     |
| Burkina Faso                     | 12.02                         | 4.96           | 6.66               | 0.40     | 34.81                               | 27.52          | 5.67               | 1.62     |
| Burundi                          | 9.56                          | 4.00           | 5.38               | 0.19     | 16.64                               | 13.17          | 2.71               | 0.76     |
| Cambodia                         | 13.16                         | 5.27           | 7.09               | 0.79     | 46.70                               | 36.09          | 7.44               | 3.17     |
| Cameroon                         | 14.99                         | 6.04           | 8.12               | 0.83     | 61.42                               | 48.16          | 9.92               | 3.33     |
| Central African Republic         | 11.28                         | 4.72           | 6.34               | 0.22     | 27.40                               | 21.98          | 4.53               | 0.89     |
| Chad                             | 13.08                         | 5.35           | 7.20               | 0.53     | 42.71                               | 33.65          | 6.93               | 2.13     |
| Comoros                          | 12.92                         | 5.30           | 7.13               | 0.49     | 39.88                               | 31.44          | 6.48               | 1.97     |
| Congo                            | 26.79                         | 10.88          | 14.64              | 1.27     | 242.81                              | 197.12         | 40.62              | 5.07     |
| Côte d'Ivoire                    | 26.48                         | 10.88          | 14.64              | 0.96     | 241.57                              | 197.12         | 40.62              | 3.83     |
| Cuba                             | 44.77                         | 16.86          | 22.67              | 5.24     | 337.52                              | 262.48         | 54.08              | 20.96    |

|                                  |       |       |       |      |        |        |       |       |
|----------------------------------|-------|-------|-------|------|--------|--------|-------|-------|
| Dem· People's Republic of Korea  | 11.98 | 4.92  | 6.62  | 0.44 | 36.48  | 28.79  | 5.93  | 1.76  |
| Democratic Republic of the Congo | 11.86 | 4.92  | 6.62  | 0.31 | 35.97  | 28.79  | 5.93  | 1.25  |
| Djibouti                         | 16.91 | 6.64  | 8.93  | 1.33 | 76.52  | 59.03  | 12.16 | 5.33  |
| Eritrea                          | 9.82  | 4.03  | 5.42  | 0.37 | 17.67  | 13.42  | 2.76  | 1.49  |
| Ethiopia                         | 10.54 | 4.31  | 5.80  | 0.42 | 23.61  | 18.17  | 3.74  | 1.70  |
| Gambia                           | 11.87 | 4.92  | 6.62  | 0.32 | 36.01  | 28.79  | 5.93  | 1.29  |
| Georgia                          | 23.28 | 8.83  | 11.88 | 2.57 | 153.89 | 119.06 | 24.53 | 10.29 |
| Ghana                            | 13.75 | 5.46  | 7.35  | 0.94 | 47.89  | 36.59  | 7.54  | 3.75  |
| Guinea                           | 10.92 | 4.50  | 6.06  | 0.36 | 26.19  | 20.51  | 4.23  | 1.46  |
| Guinea-Bissau                    | 11.68 | 4.81  | 6.47  | 0.39 | 31.85  | 25.11  | 5.17  | 1.57  |
| Guyana                           | 27.91 | 10.70 | 14.39 | 2.83 | 172.52 | 133.67 | 27.54 | 11.31 |
| Haiti                            | 13.24 | 5.41  | 7.27  | 0.56 | 41.22  | 32.32  | 6.66  | 2.24  |
| Honduras                         | 20.67 | 8.07  | 10.86 | 1.73 | 121.16 | 94.72  | 19.52 | 6.93  |
| India                            | 15.46 | 6.13  | 8.24  | 1.09 | 72.46  | 56.46  | 11.63 | 4.37  |
| Indonesia                        | 19.48 | 7.33  | 9.86  | 2.29 | 109.88 | 83.51  | 17.21 | 9.17  |
| Kenya                            | 13.16 | 5.21  | 7.00  | 0.94 | 43.29  | 32.76  | 6.75  | 3.77  |
| Kiribati                         | 21.99 | 8.96  | 12.05 | 0.98 | 119.81 | 96.10  | 19.80 | 3.90  |
| Kyrgyzstan                       | 26.28 | 10.88 | 14.64 | 0.76 | 240.76 | 197.12 | 40.62 | 3.02  |
| Lao People's Democratic Republic | 26.77 | 10.88 | 14.64 | 1.25 | 242.72 | 197.12 | 40.62 | 4.98  |
| Lesotho                          | 14.46 | 5.85  | 7.87  | 0.73 | 54.73  | 42.95  | 8.85  | 2.92  |
| Liberia                          | 10.43 | 4.32  | 5.80  | 0.31 | 21.04  | 16.41  | 3.38  | 1.25  |
| Madagascar                       | 10.38 | 4.31  | 5.80  | 0.28 | 22.71  | 17.92  | 3.69  | 1.10  |
| Malawi                           | 11.39 | 4.75  | 6.39  | 0.25 | 28.49  | 22.78  | 4.69  | 1.02  |
| Mali                             | 11.99 | 4.90  | 6.59  | 0.50 | 33.98  | 26.53  | 5.47  | 1.98  |
| Mauritania                       | 14.19 | 5.65  | 7.60  | 0.94 | 54.89  | 42.40  | 8.74  | 3.76  |
| Mongolia                         | 19.18 | 7.02  | 9.44  | 2.72 | 102.88 | 76.29  | 15.72 | 10.87 |
| Mozambique                       | 11.29 | 4.66  | 6.26  | 0.36 | 27.84  | 21.88  | 4.51  | 1.45  |
| Myanmar                          | 12.78 | 5.11  | 6.87  | 0.80 | 38.19  | 29.03  | 5.98  | 3.18  |
| Nepal                            | 11.39 | 4.64  | 6.24  | 0.51 | 30.48  | 23.59  | 4.86  | 2.04  |
| Nicaragua                        | 17.61 | 6.90  | 9.28  | 1.43 | 91.89  | 71.45  | 14.72 | 5.72  |
| Niger                            | 10.38 | 4.32  | 5.81  | 0.25 | 21.31  | 16.85  | 3.47  | 0.98  |
| Nigeria                          | 16.59 | 6.29  | 8.47  | 1.83 | 71.66  | 53.35  | 10.99 | 7.32  |
| Pakistan                         | 13.02 | 5.13  | 6.91  | 0.98 | 47.07  | 35.77  | 7.37  | 3.93  |
| Papua New Guinea                 | 19.63 | 7.71  | 10.37 | 1.55 | 99.30  | 77.19  | 15.90 | 6.21  |
| Republic of Moldova              | 26.79 | 10.88 | 14.64 | 1.27 | 242.80 | 197.12 | 40.62 | 5.06  |
| Rwanda                           | 11.91 | 4.87  | 6.56  | 0.48 | 33.21  | 25.95  | 5.35  | 1.91  |
| Sao Tome and Principe            | 26.67 | 10.88 | 14.64 | 1.14 | 242.31 | 197.12 | 40.62 | 4.57  |
| Senegal                          | 14.21 | 5.80  | 7.80  | 0.62 | 53.78  | 42.55  | 8.77  | 2.46  |
| Sierra Leone                     | 11.13 | 4.56  | 6.13  | 0.45 | 27.88  | 21.64  | 4.46  | 1.79  |
| Solomon Islands                  | 21.61 | 8.65  | 11.64 | 1.33 | 120.87 | 95.82  | 19.74 | 5.30  |
| Somalia                          | 11.92 | 4.92  | 6.62  | 0.38 | 36.23  | 28.79  | 5.93  | 1.50  |
| South Sudan                      | 12.04 | 4.92  | 6.62  | 0.50 | 36.72  | 28.79  | 5.93  | 2.00  |
| Sri Lanka                        | 19.85 | 7.32  | 9.84  | 2.69 | 116.37 | 87.57  | 18.04 | 10.76 |
| Sudan                            | 16.52 | 6.34  | 8.52  | 1.65 | 73.10  | 55.13  | 11.36 | 6.62  |
| Tajikistan                       | 13.14 | 5.33  | 7.17  | 0.63 | 46.03  | 36.07  | 7.43  | 2.54  |
| Timor-Leste                      | 26.36 | 10.88 | 14.64 | 0.83 | 241.07 | 197.12 | 40.62 | 3.33  |
| Togo                             | 11.24 | 4.63  | 6.23  | 0.38 | 27.90  | 21.86  | 4.50  | 1.53  |
| Uganda                           | 11.73 | 4.80  | 6.45  | 0.48 | 32.46  | 25.31  | 5.22  | 1.93  |
| Ukraine                          | 23.22 | 9.28  | 12.49 | 1.45 | 173.89 | 139.37 | 28.72 | 5.79  |
| United Republic of Tanzania      | 12.14 | 4.92  | 6.62  | 0.60 | 37.13  | 28.79  | 5.93  | 2.41  |

|            |       |       |       |      |        |        |       |      |
|------------|-------|-------|-------|------|--------|--------|-------|------|
| Uzbekistan | 15.79 | 6.11  | 8.22  | 1.46 | 71.72  | 54.62  | 11.25 | 5.84 |
| Viet Nam   | 26.97 | 10.88 | 14.64 | 1.45 | 243.52 | 197.12 | 40.62 | 5.78 |
| Yemen      | 12.51 | 4.92  | 6.62  | 0.96 | 38.57  | 28.79  | 5.93  | 3.85 |
| Zambia     | 13.46 | 5.36  | 7.21  | 0.89 | 44.99  | 34.34  | 7.07  | 3.58 |
| Zimbabwe   | 12.18 | 4.92  | 6.62  | 0.63 | 37.25  | 28.79  | 5.93  | 2.53 |

---

## 5. Probabilistic Analysis

| Parameter                                                                     | Base case (95% CI)  | Probability distribution                                                                                                                                                                     | Source |
|-------------------------------------------------------------------------------|---------------------|----------------------------------------------------------------------------------------------------------------------------------------------------------------------------------------------|--------|
| <b>Population projections for the 2015 birth cohort</b>                       |                     |                                                                                                                                                                                              |        |
| Population by single age/year between birth and 5·0 years                     | Country-specific    | Beta-PERT (mid = UNPOP medium variant, range = UNPOP low/high variant)                                                                                                                       | [1]    |
| <b>Disease burden estimates</b>                                               |                     |                                                                                                                                                                                              |        |
| RVGE incidence rate <5 years                                                  |                     |                                                                                                                                                                                              |        |
| Non-severe RVGE visits                                                        |                     |                                                                                                                                                                                              |        |
| Severe RVGE visits                                                            | Regional-specific   | Beta-PERT (mid = regional value, range = reported uncertainty range for RVGE incidence, proportion range for treatment seeking rate: 10%-30% for hospitalizations, 5%-25% for clinic visits) | [2 -8] |
| Severe RVGE hospitalizations                                                  |                     |                                                                                                                                                                                              |        |
| Severe RVGE mortality rate <5 years                                           | Country-specific    | Beta-PERT (mid = Log transformed mean of 3 sources of country estimates, range = 95% CI)                                                                                                     | [9-11] |
| <b>Age distribution of RVGE deaths</b>                                        |                     |                                                                                                                                                                                              |        |
| Log Logistic scale parameter                                                  | Country-specific    | Beta-PERT (mid = best fit for country/U5MR stratum, range = 95% CI for country/U5MR stratum)                                                                                                 | [12]   |
| <b>Disability weights for calculating DALYs</b>                               |                     |                                                                                                                                                                                              |        |
| Percentage of healthy time lost whilst living with the disease                |                     |                                                                                                                                                                                              |        |
| Non Severe RVGE                                                               | 18·8% (12·5-26·4)   | Beta-PERT (mid = Salomon, GBD 2013, moderate diarrhea, range = Salomon, GBD 2013, moderate diarrhea, 95% uncertainty interval)                                                               | [13]   |
| Severe RVGE                                                                   | 24·7% (16·4-34·8)   | Beta-PERT (mid = Salomon, GBD 2013, severe diarrhea, range = Salomon, GBD 2013, severe diarrhea, 95% uncertainty interval)                                                                   |        |
| Average duration of illness                                                   |                     |                                                                                                                                                                                              |        |
| Non Severe RVGE                                                               | 4 days (3-7)        | Beta-PERT (mid = CDC, range = CDC)                                                                                                                                                           | [14]   |
| Severe RVGE                                                                   | 6 days (3-7))       | Beta-PERT (mid = CDC, range = CDC)                                                                                                                                                           |        |
| <b>Vaccine coverage</b>                                                       |                     |                                                                                                                                                                                              |        |
| Doses with DTP1, DTP2, DTP3                                                   | Country-specific    | Beta-PERT (mid = WUENIC 2015, range = WUENIC 2015 +/-10%)                                                                                                                                    | [15]   |
| <b>Vaccine timeliness</b>                                                     |                     |                                                                                                                                                                                              |        |
| Log Logistic scale parameter                                                  | Country-specific    | Beta-PERT (mid = best fit for country or schedule stratum, range = median age +/- 10%)                                                                                                       | [16]   |
| <b>Initial efficacy against RVGE mortality (2wks after dose administered)</b> |                     |                                                                                                                                                                                              |        |
| Low mortality                                                                 | 99·6% (99·4-99·7)   | Beta (alpha = 4918·07, beta = 19·83, [A] = 0%, [B] = 100%)                                                                                                                                   |        |
| Medium mortality                                                              | 91·4% (89·8-92·7)   | Beta (alpha = 1394·26, beta = 131·74, [A] = 0%, [B] = 100%)                                                                                                                                  | [17]   |
| High mortality                                                                | 78·9% (75·5-82·3)   | Beta (alpha = 723·19, beta = 98·31, [A] = 0%, [B] = 100%)                                                                                                                                    |        |
| <b>Mean duration of vaccine efficacy in months</b>                            |                     |                                                                                                                                                                                              |        |
| Low mortality                                                                 | 176·8 (114·7-268·0) | Gamma (alpha = 21·82, beta = 8·41)                                                                                                                                                           |        |
| Medium mortality                                                              | 121·9 (81·3-182·4)  | Gamma (alpha = 24·01, beta = 5·28)                                                                                                                                                           | [17]   |
| High mortality                                                                | 13·2 (9·2-20·5)     | Gamma (alpha = 50·75, beta = 0·17)                                                                                                                                                           |        |
| <b>Relative efficacy of 1 dose versus 2/3 doses</b>                           |                     |                                                                                                                                                                                              |        |
| Low- and middle-income countries (LMICs)                                      | 0·63 (0·51-0·79)    | Beta (alpha = 27·05, beta = 15·68, [A] = 0, [B] = 1)                                                                                                                                         | [17]   |
| <b>Incremental health system costs</b>                                        |                     |                                                                                                                                                                                              |        |
| Low income countries                                                          | \$1·25 (1·2-50)     | Beta-PERT (mid = ICAN data, range based on authors assumptions)                                                                                                                              |        |
| Middle income countries                                                       | \$1·86 (1·2-50)     | Beta-PERT (mid = ICAN data, range based on authors assumptions)                                                                                                                              | [18]   |
| <b>International handling</b>                                                 | 3·5% (1·4-5)        | Beta-PERT (mid = UNICEF, range based on min and max from UNICEF)                                                                                                                             |        |
| <b>International delivery</b>                                                 | 6% (2-15)           | Beta-PERT (mid = literature data, range based on assumptions)                                                                                                                                |        |
| <b>Vaccine wastage</b>                                                        |                     |                                                                                                                                                                                              |        |
| ROTARIX, RotaTeq                                                              | 5% (1-10)           | Beta-PERT                                                                                                                                                                                    |        |
| ROTAVAC                                                                       | 25% (10-50)         | Beta-PERT (mid = India MoH, low range based on assumption, high range based on Gavi recommendation)                                                                                          | [19]   |
| ROTASIIL                                                                      | 10% (5-15)          |                                                                                                                                                                                              |        |
| <b>Treatment costs</b>                                                        |                     |                                                                                                                                                                                              |        |

Cost per clinic visit  
Cost per hospitalization

Country-specific (+/- 50%)  
Country-specific (+/- 50%)

Beta-PERT (mid = modeled data from WHO CHOICE, range = modeled data from  
WHO CHOICE +/- 50%)

[20]

- 1 United Nations DESA/Population Division. World Population Prospects 2017. 2017. <https://population.un.org/wpp/> (accessed Feb 7, 2018).
- 2 Yen C, Armero Guardado JA, Alberto P, et al. Decline in rotavirus hospitalizations and health care visits for childhood diarrhea following rotavirus vaccination in El Salvador. *Pediatr Infect Dis J* 2011; 30(1 Suppl): S6-S10.
- 3 Bahl R, Ray P, Subodh S, et al. Incidence of severe rotavirus diarrhea in New Delhi, India, and G and P types of the infecting rotavirus strains. *J Infect Dis* 2005; 192 Suppl 1: S114-9.
- 4 Omore R, Khagayi S, Ogwel B, et al. Rates of hospitalization and death for all-cause and rotavirus acute gastroenteritis before rotavirus vaccine introduction in Kenya, 2010-2013. *BMC Infect Dis* 2019; 19(1): 47.
- 5 Rheingans RD, Constenla D, Antil L, Innis BL, Breuer T. Economic and health burden of rotavirus gastroenteritis for the 2003 birth cohort in eight Latin American and Caribbean countries. *Rev Panam Salud Publica* 2007; 21(4): 192-204.
- 6 Carlos CC, Inobaya MT, Bresee JS, et al. The burden of hospitalizations and clinic visits for rotavirus disease in children aged <5 years in the Philippines. *J Infect Dis* 2009; 200 Suppl 1: S174-81.
- 7 Fischer TK, Anh DD, Antil L, et al. Health care costs of diarrheal disease and estimates of the cost-effectiveness of rotavirus vaccination in Vietnam. *J Infect Dis* 2005; 192(10): 1720-6.
- 8 Parashar UD, Hummelman EG, Bresee JS, Miller MA, Glass RI. Global illness and deaths caused by rotavirus disease in children. *Emerg Infect Dis* 2003; 9: 565-72.
- 9 GBD 2013 Mortality and Causes of Death Collaborators. Global, regional, and national age-sex specific all-cause and cause-specific mortality for 240 causes of death, 1990-2013: a systematic analysis for the Global Burden of Disease Study 2013. *Lancet* 2015; 385: 117-71.
- 10 Vos T, Barber R, Phillips DE, Lopez AD, Murray CJL. Causes of child death: comparison of MCEE and GBD 2013 estimates – Authors’ reply. *Lancet* 2015; 385: 2462-4.
- 11 Tate JE, Burton AH, Boschi-Pinto C, Parashar UD. Global, Regional, and National Estimates of Rotavirus Mortality in Children <5 Years of Age, 2000-2013. *Clin Infect Dis* 2016; 62: S96-105.
- 12 Hasso-Agopsowicz M, Ladva CN, Lopman B, et al. Global review of the age distribution of rotavirus disease in children aged <5 years before the introduction of rotavirus vaccination. *Clin Infect Dis* 2019; published online Jan 28. DOI:10.1093/cid/ciz060. 36 Salomon JA, Haagsma JA, Davis A, et al. Disability weights for the Global Burden of Disease 2013 study. *Lancet Glob Heal* 2015; 3: e712-23.
- 13 Salomon JA, Haagsma JA, Davis A, et al. Disability weights for the Global Burden of Disease 2013 study. *Lancet Glob Heal* 2015; 3: e712-23.
- 14 Centers for Disease Control and Prevention. Rotavirus. In: Hamborsky J, Kroger A, Wolfe C, eds. *Epidemiology and Prevention of Vaccine Preventable Diseases*, 13th ed. Washington D.C.: Public Health Foundation, 2015. <https://www.cdc.gov/vaccines/pubs/pinkbook/rota.html> (accessed May 21, 2019).
- 15 World Health Organization. WHO/UNICEF estimates of national immunization coverage. 2017. [https://www.who.int/immunization/monitoring\\_surveillance/routine/coverage/en/index4.html](https://www.who.int/immunization/monitoring_surveillance/routine/coverage/en/index4.html) (accessed Feb 7, 2018).
- 16 Clark A, Tate J, Parashar U, et al. Mortality reduction benefits and intussusception risks of rotavirus vaccination in 135 low-income and middle-income countries: a modelling analysis of current and alternative schedules. *Lancet Glob Health* 7: e1541-52.
- 17 Clark A, van Zandvoort K, Flasche S, et al. Efficacy of live oral rotavirus vaccines by duration of follow-up: a meta-regression of randomised controlled trials. *Lancet Infect Dis* 2019; 19: 717-27. [http://dx.doi.org/10.1016/S1473-3099\(19\)30126-4](http://dx.doi.org/10.1016/S1473-3099(19)30126-4)
- 18 Immunization Costing Action Network (ICAN). Unit Cost Repository for Immunization Delivery. 2018. <https://immunizationeconomics.org/ican-idcc> (accessed April 13, 2018).
- 19 Gavi The Vaccine Alliance. Gavi, the Vaccine Alliance Co-financing Policy Version 2.0. 2016 <https://www.gavi.org/library/gavi-documents/policies/gavi-co-financing-policy/> (accessed May 21, 2019).
- 20 Baral R, Nonvignon J, Debellut F, Agyemang SA, Clark A, Pecenka C. Cost of illness for childhood diarrhoea in low- and middle-income countries: a systematic review of evidence and modelled estimates. (Unpublished).



## 6. Vaccine price and co-financing inputs for all countries - alternative scenarios

| Country      | Vaccine preference | Vaccine price per dose<br>US\$ | Average Co-financing per dose<br>over the period<br>2018-2027<br>US\$ | Country    | Vaccine preference | Vaccine price per dose<br>US\$ | Average Co-financing per dose<br>over the period<br>2018-2027<br>US\$ |
|--------------|--------------------|--------------------------------|-----------------------------------------------------------------------|------------|--------------------|--------------------------------|-----------------------------------------------------------------------|
| Afghanistan  | ROTARIX®           | 2.29                           | 0.20                                                                  | Lao PDR    | ROTARIX®           | 2.29                           | 1.88                                                                  |
|              | ROTAVAC®           | 0.85                           | 0.13                                                                  |            | ROTAVAC®           | 0.85                           | 0.70                                                                  |
|              | ROTASII®           | 0.95                           | 0.13                                                                  |            | ROTASII®           | 0.95                           | 0.78                                                                  |
| Angola       | ROTARIX®           | 2.29                           | 2.29                                                                  | Lesotho    | ROTARIX®           | 2.29                           | 0.46                                                                  |
|              | ROTAVAC®           | 0.85                           | 0.85                                                                  |            | ROTAVAC®           | 0.85                           | 0.17                                                                  |
|              | ROTASII®           | 0.95                           | 0.95                                                                  |            | ROTASII®           | 0.95                           | 0.19                                                                  |
| Armenia      | ROTARIX®           | 2.29                           | 2.29                                                                  | Liberia    | ROTARIX®           | 2.29                           | 0.20                                                                  |
|              | ROTAVAC®           | 0.85                           | 0.85                                                                  |            | ROTAVAC®           | 0.85                           | 0.13                                                                  |
|              | ROTASII®           | 0.95                           | 0.95                                                                  |            | ROTASII®           | 0.95                           | 0.13                                                                  |
| Azerbaijan   | ROTARIX®           | 6.20                           | 6.20                                                                  | Madagascar | ROTARIX®           | 2.29                           | 0.20                                                                  |
|              | ROTAVAC®           | 0.85                           | 0.85                                                                  |            | ROTAVAC®           | 0.85                           | 0.13                                                                  |
|              | ROTASII®           | 0.95                           | 0.95                                                                  |            | ROTASII®           | 0.95                           | 0.13                                                                  |
| Bangladesh   | ROTARIX®           | 2.29                           | 0.88                                                                  | Malawi     | ROTARIX®           | 2.29                           | 0.20                                                                  |
|              | ROTAVAC®           | 0.85                           | 0.33                                                                  |            | ROTAVAC®           | 0.85                           | 0.13                                                                  |
|              | ROTASII®           | 0.95                           | 0.36                                                                  |            | ROTASII®           | 0.95                           | 0.13                                                                  |
| Benin        | ROTARIX®           | 2.29                           | 0.26                                                                  | Mali       | ROTARIX®           | 2.29                           | 0.20                                                                  |
|              | ROTAVAC®           | 0.85                           | 0.17                                                                  |            | ROTAVAC®           | 0.85                           | 0.13                                                                  |
|              | ROTASII®           | 0.95                           | 0.17                                                                  |            | ROTASII®           | 0.95                           | 0.13                                                                  |
| Bhutan       | ROTARIX®           | 6.20                           | 6.20                                                                  | Mauritania | ROTARIX®           | 2.29                           | 0.55                                                                  |
|              | ROTAVAC®           | 0.85                           | 0.85                                                                  |            | ROTAVAC®           | 0.85                           | 0.20                                                                  |
|              | ROTASII®           | 0.95                           | 0.95                                                                  |            | ROTASII®           | 0.95                           | 0.23                                                                  |
| Bolivia      | ROTARIX®           | 6.50                           | 6.50                                                                  | Mongolia   | ROTARIX®           | 6.20                           | 6.20                                                                  |
|              | ROTAVAC®           | 0.85                           | 0.85                                                                  |            | ROTAVAC®           | 0.85                           | 0.85                                                                  |
|              | ROTASII®           | 0.95                           | 0.95                                                                  |            | ROTASII®           | 0.95                           | 0.95                                                                  |
| Burkina Faso | ROTARIX®           | 2.29                           | 0.20                                                                  | Mozambique | ROTARIX®           | 2.29                           | 0.20                                                                  |
|              | ROTAVAC®           | 0.85                           | 0.13                                                                  |            | ROTAVAC®           | 0.85                           | 0.13                                                                  |
|              | ROTASII®           | 0.95                           | 0.13                                                                  |            | ROTASII®           | 0.95                           | 0.13                                                                  |
| Burundi      | ROTARIX®           | 2.29                           | 0.20                                                                  | Myanmar    | ROTARIX®           | 2.29                           | 0.71                                                                  |
|              | ROTAVAC®           | 0.85                           | 0.13                                                                  |            | ROTAVAC®           | 0.85                           | 0.26                                                                  |
|              | ROTASII®           | 0.95                           | 0.13                                                                  |            | ROTASII®           | 0.95                           | 0.29                                                                  |
| Cambodia     | ROTARIX®           | 2.29                           | 0.47                                                                  | Nepal      | ROTARIX®           | 2.29                           | 0.20                                                                  |
|              | ROTAVAC®           | 0.85                           | 0.18                                                                  |            | ROTAVAC®           | 0.85                           | 0.13                                                                  |
|              | ROTASII®           | 0.95                           | 0.20                                                                  |            | ROTASII®           | 0.95                           | 0.13                                                                  |
| Cameroon     | ROTARIX®           | 2.29                           | 0.90                                                                  | Nicaragua  | ROTARIX®           | 6.50                           | 5.98                                                                  |
|              | ROTAVAC®           | 0.85                           | 0.33                                                                  |            | ROTAVAC®           | 0.85                           | 0.78                                                                  |
|              | ROTASII®           | 0.95                           | 0.37                                                                  |            | ROTASII®           | 0.95                           | 0.87                                                                  |
| CAR          | ROTARIX®           | 2.29                           | 0.20                                                                  | Niger      | ROTARIX®           | 2.29                           | 0.20                                                                  |
|              | ROTAVAC®           | 0.85                           | 0.13                                                                  |            | ROTAVAC®           | 0.85                           | 0.13                                                                  |
|              | ROTASII®           | 0.95                           | 0.13                                                                  |            | ROTASII®           | 0.95                           | 0.13                                                                  |
| Chad         | ROTARIX®           | 2.29                           | 0.20                                                                  | Nigeria    | ROTARIX®           | 2.29                           | 1.39                                                                  |
|              | ROTAVAC®           | 0.85                           | 0.13                                                                  |            | ROTAVAC®           | 0.85                           | 0.51                                                                  |
|              | ROTASII®           | 0.95                           | 0.13                                                                  |            | ROTASII®           | 0.95                           | 0.58                                                                  |
| Comoros      | ROTARIX®           | 2.29                           | 0.20                                                                  | Pakistan   | ROTARIX®           | 2.29                           | 1.25                                                                  |

|               |          |      |      |                     |          |      |      |
|---------------|----------|------|------|---------------------|----------|------|------|
|               | ROTAVAC® | 0-85 | 0-13 |                     | ROTAVAC® | 0-85 | 0-46 |
|               | ROTASII® | 0-95 | 0-13 |                     | ROTASII® | 0-95 | 0-52 |
| Congo         | ROTARIX® | 2-29 | 2-29 | Papua New Guinea    | ROTARIX® | 2-29 | 2-10 |
|               | ROTAVAC® | 0-85 | 0-85 |                     | ROTAVAC® | 0-85 | 0-78 |
|               | ROTASII® | 0-95 | 0-95 |                     | ROTASII® | 0-95 | 0-87 |
| Côte d'Ivoire | ROTARIX® | 2-29 | 1-11 | Republic of Moldova | ROTARIX® | 2-29 | 2-29 |
|               | ROTAVAC® | 0-85 | 0-41 |                     | ROTAVAC® | 0-85 | 0-85 |
|               | ROTASII® | 0-95 | 0-46 |                     | ROTASII® | 0-95 | 0-95 |
| Cuba          | ROTARIX® | 6-50 | 6-50 | Rwanda              | ROTARIX® | 2-29 | 0-20 |
|               | ROTAVAC® | 0-85 | 0-85 |                     | ROTAVAC® | 0-85 | 0-14 |
|               | ROTASII® | 0-95 | 0-95 |                     | ROTASII® | 0-95 | 0-14 |
| Djibouti      | ROTARIX® | 2-29 | 0-53 | Sao Tome & P.       | ROTARIX® | 2-29 | 1-69 |
|               | ROTAVAC® | 0-85 | 0-20 |                     | ROTAVAC® | 0-85 | 0-63 |
|               | ROTASII® | 0-95 | 0-22 |                     | ROTASII® | 0-95 | 0-70 |
| DPR Korea     | ROTARIX® | 2-29 | 0-20 | Senegal             | ROTARIX® | 2-29 | 0-20 |
|               | ROTAVAC® | 0-85 | 0-13 |                     | ROTAVAC® | 0-85 | 0-13 |
|               | ROTASII® | 0-95 | 0-13 |                     | ROTASII® | 0-95 | 0-13 |
| DR Congo      | ROTARIX® | 2-29 | 0-20 | Sierra Leone        | ROTARIX® | 2-29 | 0-20 |
|               | ROTAVAC® | 0-85 | 0-13 |                     | ROTAVAC® | 0-85 | 0-13 |
|               | ROTASII® | 0-95 | 0-13 |                     | ROTASII® | 0-95 | 0-13 |
| Eritrea       | ROTARIX® | 2-29 | 0-23 | Solomon Islands     | ROTARIX® | 2-29 | 1-93 |
|               | ROTAVAC® | 0-85 | 0-16 |                     | ROTAVAC® | 0-85 | 0-72 |
|               | ROTASII® | 0-95 | 0-16 |                     | ROTASII® | 0-95 | 0-80 |
| Ethiopia      | ROTARIX® | 2-29 | 0-21 | Somalia             | ROTARIX® | 2-29 | 0-20 |
|               | ROTAVAC® | 0-85 | 0-14 |                     | ROTAVAC® | 0-85 | 0-13 |
|               | ROTASII® | 0-95 | 0-14 |                     | ROTASII® | 0-95 | 0-13 |
| Gambia        | ROTARIX® | 2-29 | 0-20 | South Sudan         | ROTARIX® | 2-29 | 0-20 |
|               | ROTAVAC® | 0-85 | 0-13 |                     | ROTAVAC® | 0-85 | 0-13 |
|               | ROTASII® | 0-95 | 0-13 |                     | ROTASII® | 0-95 | 0-13 |
| Georgia       | ROTARIX® | 2-29 | 2-29 | Sri Lanka           | ROTARIX® | 6-20 | 6-20 |
|               | ROTAVAC® | 0-85 | 0-85 |                     | ROTAVAC® | 0-85 | 0-85 |
|               | ROTASII® | 0-95 | 0-95 |                     | ROTASII® | 0-95 | 0-95 |
| Ghana         | ROTARIX® | 2-29 | 0-67 | Sudan               | ROTARIX® | 2-29 | 1-34 |
|               | ROTAVAC® | 0-85 | 0-25 |                     | ROTAVAC® | 0-85 | 0-50 |
|               | ROTASII® | 0-95 | 0-28 |                     | ROTASII® | 0-95 | 0-55 |
| Guinea        | ROTARIX® | 2-29 | 0-20 | Tajikistan          | ROTARIX® | 2-29 | 0-60 |
|               | ROTAVAC® | 0-85 | 0-13 |                     | ROTAVAC® | 0-85 | 0-22 |
|               | ROTASII® | 0-95 | 0-13 |                     | ROTASII® | 0-95 | 0-25 |
| Guinea-Bissau | ROTARIX® | 2-29 | 0-20 | Timor-Leste         | ROTARIX® | 6-20 | 6-20 |
|               | ROTAVAC® | 0-85 | 0-13 |                     | ROTAVAC® | 0-85 | 0-85 |
|               | ROTASII® | 0-95 | 0-13 |                     | ROTASII® | 0-95 | 0-95 |
| Guyana        | ROTARIX® | 6-50 | 6-50 | Togo                | ROTARIX® | 2-29 | 0-20 |
|               | ROTAVAC® | 0-85 | 0-85 |                     | ROTAVAC® | 0-85 | 0-13 |
|               | ROTASII® | 0-95 | 0-95 |                     | ROTASII® | 0-95 | 0-13 |
| Haiti         | ROTARIX® | 6-50 | 0-20 | Uganda              | ROTARIX® | 2-29 | 0-20 |
|               | ROTAVAC® | 0-85 | 0-13 |                     | ROTAVAC® | 0-85 | 0-13 |
|               | ROTASII® | 0-95 | 0-13 |                     | ROTASII® | 0-95 | 0-13 |
| Honduras      | ROTARIX® | 6-50 | 6-50 | Ukraine             | ROTARIX® | 6-20 | 6-20 |
|               | ROTAVAC® | 0-85 | 0-85 |                     | ROTAVAC® | 0-85 | 0-85 |
|               | ROTASII® | 0-95 | 0-95 |                     | ROTASII® | 0-95 | 0-95 |

|            |            |      |      |                                |            |      |      |
|------------|------------|------|------|--------------------------------|------------|------|------|
| India      | ROTARIX®   | 2:29 | 2:29 | United Republic of<br>Tanzania | ROTARIX®   | 2:29 | 0:36 |
|            | ROTAVAC®   | 0:85 | 0:85 |                                | ROTAVAC®   | 0:85 | 0:24 |
|            | ROTASIIIL® | 0:95 | 0:95 |                                | ROTASIIIL® | 0:95 | 0:24 |
| Indonesia  | ROTARIX®   | 6:20 | 6:20 | Uzbekistan                     | ROTARIX®   | 2:29 | 2:29 |
|            | ROTAVAC®   | 0:85 | 0:85 |                                | ROTAVAC®   | 0:85 | 0:85 |
|            | ROTASIIIL® | 0:95 | 0:95 |                                | ROTASIIIL® | 0:95 | 0:95 |
| Kenya      | ROTARIX®   | 2:29 | 0:87 | Viet Nam                       | ROTARIX®   | 2:29 | 2:29 |
|            | ROTAVAC®   | 0:85 | 0:32 |                                | ROTAVAC®   | 0:85 | 0:85 |
|            | ROTASIIIL® | 0:95 | 0:36 |                                | ROTASIIIL® | 0:95 | 0:95 |
| Kiribati   | ROTARIX®   | 6:20 | 6:20 | Yemen                          | ROTARIX®   | 2:29 | 0:68 |
|            | ROTAVAC®   | 0:85 | 0:85 |                                | ROTAVAC®   | 0:85 | 0:25 |
|            | ROTASIIIL® | 0:95 | 0:95 |                                | ROTASIIIL® | 0:95 | 0:28 |
| Kyrgyzstan | ROTARIX®   | 2:29 | 0:65 | Zambia                         | ROTARIX®   | 2:29 | 0:74 |
|            | ROTAVAC®   | 0:85 | 0:24 |                                | ROTAVAC®   | 0:85 | 0:28 |
|            | ROTASIIIL® | 0:95 | 0:27 |                                | ROTASIIIL® | 0:95 | 0:31 |
|            |            |      |      | Zimbabwe                       | ROTARIX®   | 2:29 | 0:20 |
|            |            |      |      |                                | ROTAVAC®   | 0:85 | 0:13 |
|            |            |      |      |                                | ROTASIIIL® | 0:95 | 0:13 |

## 7. Results by country for alternative scenarios (all countries using rotavirus vaccine from 2018 to 2027)

| Countries                        | Vaccine    | Number of Fully Immunized Child | Averted RV cases | Averted RV deaths | Total healthcare costs averted government perspective* | Vaccine program costs* | Vaccine program costs with Gavi subsidy* | Cost per DALY averted govt. perspective* |
|----------------------------------|------------|---------------------------------|------------------|-------------------|--------------------------------------------------------|------------------------|------------------------------------------|------------------------------------------|
| Afghanistan                      | ROTARIX®   | 7,762,176                       | 1,580,540        | 7,305             | \$1,790,959                                            | \$54,638,902           | \$20,878,029                             | \$102                                    |
|                                  | ROTAVAC®   | 6,356,393                       | 1,773,862        | 8,198             | \$2,009,196                                            | \$50,995,752           | \$29,655,963                             | \$132                                    |
|                                  | ROTASIIIL® | 6,356,393                       | 1,773,862        | 8,198             | \$2,009,196                                            | \$49,255,490           | \$28,990,961                             | \$128                                    |
| Angola                           | ROTARIX®   | 9,358,710                       | 2,242,237        | 30,528            | \$21,333,511                                           | \$77,669,464           | \$77,669,464                             | \$74                                     |
|                                  | ROTAVAC®   | 8,296,959                       | 2,481,298        | 33,783            | \$23,604,682                                           | \$76,353,426           | \$76,353,426                             | \$62                                     |
|                                  | ROTASIIIL® | 8,296,959                       | 2,481,298        | 33,783            | \$23,604,682                                           | \$74,262,492           | \$74,262,492                             | \$60                                     |
| Armenia                          | ROTARIX®   | 307,794                         | 106,670          | 9                 | \$473,387                                              | \$2,499,384            | \$2,499,384                              | \$4,337                                  |
|                                  | ROTAVAC®   | 283,678                         | 110,379          | 9                 | \$489,905                                              | \$2,564,715            | \$2,564,715                              | \$4,292                                  |
|                                  | ROTASIIIL® | 283,678                         | 110,379          | 9                 | \$489,905                                              | \$2,494,434            | \$2,494,434                              | \$4,146                                  |
| Azerbaijan                       | ROTARIX®   | 1,331,157                       | 230,840          | 165               | \$1,249,383                                            | \$21,223,960           | \$21,223,960                             | \$4,233                                  |
|                                  | ROTAVAC®   | 1,296,082                       | 256,505          | 183               | \$1,388,389                                            | \$10,954,903           | \$10,954,903                             | \$1,824                                  |
|                                  | ROTASIIIL® | 1,296,082                       | 256,505          | 183               | \$1,388,389                                            | \$10,654,872           | \$10,654,872                             | \$1,767                                  |
| Bangladesh                       | ROTARIX®   | 28,123,647                      | 5,833,670        | 5,519             | \$11,432,203                                           | \$224,570,680          | \$139,018,609                            | \$813                                    |
|                                  | ROTAVAC®   | 27,821,356                      | 6,381,993        | 6,038             | \$12,508,907                                           | \$231,188,876          | \$171,162,261                            | \$924                                    |
|                                  | ROTASIIIL® | 27,821,356                      | 6,381,993        | 6,038             | \$12,508,907                                           | \$224,858,236          | \$168,951,095                            | \$911                                    |
| Benin                            | ROTARIX®   | 3,519,063                       | 830,088          | 5,999             | \$2,192,702                                            | \$24,316,608           | \$9,672,091                              | \$50                                     |
|                                  | ROTAVAC®   | 3,409,188                       | 915,805          | 6,618             | \$2,419,236                                            | \$23,113,488           | \$13,917,319                             | \$69                                     |
|                                  | ROTASIIIL® | 3,409,188                       | 915,805          | 6,618             | \$2,419,236                                            | \$22,326,095           | \$13,537,869                             | \$67                                     |
| Bhutan                           | ROTARIX®   | 133,463                         | 28,184           | 15                | \$118,366                                              | \$2,134,759            | \$2,134,759                              | \$4,559                                  |
|                                  | ROTAVAC®   | 130,982                         | 31,051           | 16                | \$130,410                                              | \$1,101,703            | \$1,101,703                              | \$1,993                                  |
|                                  | ROTASIIIL® | 130,982                         | 31,051           | 16                | \$130,410                                              | \$1,071,531            | \$1,071,531                              | \$1,931                                  |
| Bolivia (Plurinational State of) | ROTARIX®   | 2,458,502                       | 552,970          | 820               | \$4,601,265                                            | \$40,490,928           | \$40,490,928                             | \$1,599                                  |
|                                  | ROTAVAC®   | 2,434,970                       | 618,446          | 917               | \$5,145,490                                            | \$20,176,743           | \$20,176,743                             | \$599                                    |

|                                 |           |            |           |        |              |               |               |         |
|---------------------------------|-----------|------------|-----------|--------|--------------|---------------|---------------|---------|
|                                 | ROTASIIL® | 2,434,970  | 618,446   | 917    | \$5,145,490  | \$19,624,199  | \$19,624,199  | \$577   |
| Burkina Faso                    | ROTARIX®  | 7,100,998  | 1,595,662 | 10,176 | \$4,572,707  | \$48,962,773  | \$18,709,128  | \$55    |
|                                 | ROTAVAC®  | 6,938,849  | 1,741,437 | 11,105 | \$4,990,861  | \$46,597,089  | \$27,096,388  | \$79    |
|                                 | ROTASIIL® | 6,938,849  | 1,741,437 | 11,105 | \$4,990,861  | \$45,009,804  | \$26,491,697  | \$77    |
| Burundi                         | ROTARIX®  | 4,369,163  | 975,496   | 6,008  | \$1,609,641  | \$30,075,387  | \$11,492,083  | \$66    |
|                                 | ROTAVAC®  | 4,299,965  | 1,065,399 | 6,562  | \$1,758,198  | \$28,705,014  | \$16,692,071  | \$91    |
|                                 | ROTASIIL® | 4,299,965  | 1,065,399 | 6,562  | \$1,758,198  | \$27,727,215  | \$16,319,576  | \$89    |
| Cambodia                        | ROTARIX®  | 3,130,641  | 636,681   | 593    | \$1,615,454  | \$24,997,301  | \$13,204,131  | \$694   |
|                                 | ROTAVAC®  | 3,093,143  | 693,787   | 646    | \$1,760,655  | \$25,723,851  | \$17,452,512  | \$863   |
|                                 | ROTASIIL® | 3,093,143  | 693,787   | 646    | \$1,760,655  | \$25,019,452  | \$17,315,754  | \$855   |
| Cameroon                        | ROTARIX®  | 7,659,052  | 1,813,529 | 13,867 | \$7,230,672  | \$61,673,034  | \$39,524,515  | \$93    |
|                                 | ROTAVAC®  | 7,329,381  | 1,975,639 | 15,107 | \$7,877,224  | \$62,574,926  | \$47,259,788  | \$104   |
|                                 | ROTASIIL® | 7,329,381  | 1,975,639 | 15,107 | \$7,877,224  | \$60,861,379  | \$46,597,280  | \$102   |
| Central African Republic        | ROTARIX®  | 945,985    | 247,845   | 3,149  | \$388,046    | \$7,106,568   | \$2,715,485   | \$30    |
|                                 | ROTAVAC®  | 733,714    | 269,033   | 3,419  | \$421,169    | \$6,240,284   | \$3,628,809   | \$38    |
|                                 | ROTASIIL® | 733,714    | 269,033   | 3,419  | \$421,169    | \$6,027,607   | \$3,547,718   | \$37    |
| Chad                            | ROTARIX®  | 3,296,107  | 703,117   | 11,176 | \$1,260,821  | \$24,671,508  | \$9,427,211   | \$30    |
|                                 | ROTAVAC®  | 2,812,216  | 766,128   | 12,178 | \$1,373,576  | \$22,253,447  | \$12,941,416  | \$40    |
|                                 | ROTASIIL® | 2,812,216  | 766,128   | 12,178 | \$1,373,576  | \$21,493,685  | \$12,650,864  | \$39    |
| Comoros                         | ROTARIX®  | 240,962    | 54,358    | 176    | \$139,814    | \$1,673,552   | \$639,480     | \$111   |
|                                 | ROTAVAC®  | 228,838    | 59,906    | 194    | \$154,074    | \$1,588,154   | \$923,524     | \$155   |
|                                 | ROTASIIL® | 228,838    | 59,906    | 194    | \$154,074    | \$1,534,044   | \$902,903     | \$150   |
| Congo                           | ROTARIX®  | 1,536,206  | 348,359   | 1,090  | \$4,065,847  | \$12,290,418  | \$12,290,418  | \$292   |
|                                 | ROTAVAC®  | 1,487,337  | 380,510   | 1,191  | \$4,441,457  | \$12,527,243  | \$12,527,243  | \$262   |
|                                 | ROTASIIL® | 1,487,337  | 380,510   | 1,191  | \$4,441,457  | \$12,184,205  | \$12,184,205  | \$251   |
| Côte d'Ivoire                   | ROTARIX®  | 8,300,070  | 1,986,436 | 9,045  | \$20,328,412 | \$68,545,450  | \$47,462,102  | \$123   |
|                                 | ROTAVAC®  | 7,677,006  | 2,171,684 | 9,889  | \$22,224,658 | \$68,486,281  | \$54,136,596  | \$133   |
|                                 | ROTASIIL® | 7,677,006  | 2,171,684 | 9,889  | \$22,224,658 | \$66,610,458  | \$53,245,556  | \$129   |
| Cuba                            | ROTARIX®  | 1,127,021  | 502,734   | 18     | \$6,119,296  | \$18,565,074  | \$18,565,074  | \$7,544 |
|                                 | ROTAVAC®  | 1,116,234  | 508,721   | 19     | \$6,191,925  | \$9,251,615   | \$9,251,615   | \$1,833 |
|                                 | ROTASIIL® | 1,116,234  | 508,721   | 19     | \$6,191,925  | \$8,998,257   | \$8,998,257   | \$1,681 |
| Dem. People's Republic of Korea | ROTARIX®  | 3,334,760  | 1,180,956 | 758    | \$2,151,598  | \$23,000,045  | \$8,788,530   | \$300   |
|                                 | ROTAVAC®  | 3,272,406  | 1,214,173 | 779    | \$2,212,329  | \$22,063,877  | \$12,830,293  | \$467   |
|                                 | ROTASIIL® | 3,272,406  | 1,214,173 | 779    | \$2,212,329  | \$21,312,178  | \$12,543,852  | \$455   |
| Dem. Rep. of the Congo          | ROTARIX®  | 27,853,068 | 6,592,422 | 48,082 | \$16,933,114 | \$191,321,705 | \$73,105,790  | \$46    |
|                                 | ROTAVAC®  | 27,297,657 | 7,268,535 | 53,013 | \$18,669,915 | \$183,426,127 | \$106,663,660 | \$66    |
|                                 | ROTASIIL® | 27,297,657 | 7,268,535 | 53,013 | \$18,669,915 | \$177,176,708 | \$104,282,116 | \$64    |
| Djibouti                        | ROTARIX®  | 178,289    | 40,238    | 121    | \$127,781    | \$1,441,579   | \$786,340     | \$212   |
|                                 | ROTAVAC®  | 169,808    | 44,216    | 133    | \$140,413    | \$1,466,119   | \$1,012,010   | \$256   |
|                                 | ROTASIIL® | 169,808    | 44,216    | 133    | \$140,413    | \$1,425,966   | \$1,003,021   | \$253   |
| Eritrea                         | ROTARIX®  | 1,539,050  | 261,276   | 770    | \$421,978    | \$10,611,584  | \$4,155,848   | \$188   |
|                                 | ROTAVAC®  | 1,502,333  | 287,766   | 848    | \$464,824    | \$10,153,019  | \$6,031,664   | \$254   |
|                                 | ROTASIIL® | 1,502,333  | 287,766   | 848    | \$464,824    | \$9,807,115   | \$5,878,586   | \$247   |
| Ethiopia                        | ROTARIX®  | 26,078,179 | 5,162,506 | 16,375 | \$7,580,039  | \$187,304,858 | \$72,057,918  | \$152   |
|                                 | ROTAVAC®  | 24,772,249 | 5,563,870 | 17,648 | \$8,169,938  | \$175,334,731 | \$102,561,211 | \$206   |
|                                 | ROTASIIL® | 24,772,249 | 5,563,870 | 17,648 | \$8,169,938  | \$169,357,278 | \$100,180,790 | \$201   |
| Gambia                          | ROTARIX®  | 818,934    | 167,343   | 533    | \$330,064    | \$5,663,362   | \$2,164,023   | \$137   |
|                                 | ROTAVAC®  | 792,715    | 184,210   | 587    | \$363,354    | \$5,391,343   | \$3,135,099   | \$188   |
|                                 | ROTASIIL® | 792,715    | 184,210   | 587    | \$363,354    | \$5,207,671   | \$3,065,113   | \$183   |
| Georgia                         | ROTARIX®  | 421,489    | 192,937   | 12     | \$738,532    | \$3,395,328   | \$3,395,328   | \$3,581 |

|                                  |           |             |            |         |               |                 |                 |         |
|----------------------------------|-----------|-------------|------------|---------|---------------|-----------------|-----------------|---------|
|                                  | ROTAVAC®  | 401,587     | 194,890    | 12      | \$745,984     | \$3,466,965     | \$3,466,965     | \$3,631 |
|                                  | ROTASIIL® | 401,587     | 194,890    | 12      | \$745,984     | \$3,372,013     | \$3,372,013     | \$3,504 |
| Ghana                            | ROTARIX®  | 8,085,885   | 1,775,985  | 6,344   | \$6,160,965   | \$64,090,055    | \$37,213,746    | \$192   |
|                                  | ROTAVAC®  | 8,040,271   | 1,931,569  | 6,899   | \$6,701,526   | \$66,138,805    | \$47,235,298    | \$230   |
|                                  | ROTASIIL® | 8,040,271   | 1,931,569  | 6,899   | \$6,701,526   | \$64,327,732    | \$46,721,525    | \$227   |
| Guinea                           | ROTARIX®  | 2,819,849   | 637,498    | 2,654   | \$1,079,517   | \$19,901,116    | \$7,604,400     | \$96    |
|                                  | ROTAVAC®  | 2,600,878   | 695,933    | 2,897   | \$1,178,462   | \$18,533,035    | \$10,777,108    | \$130   |
|                                  | ROTASIIL® | 2,600,878   | 695,933    | 2,897   | \$1,178,462   | \$17,901,586    | \$10,536,462    | \$126   |
| Guinea-Bissau                    | ROTARIX®  | 584,936     | 127,634    | 848     | \$320,995     | \$4,118,150     | \$1,573,583     | \$59    |
|                                  | ROTAVAC®  | 545,182     | 140,466    | 933     | \$353,237     | \$3,874,784     | \$2,253,224     | \$81    |
|                                  | ROTASIIL® | 545,182     | 140,466    | 933     | \$353,237     | \$3,742,752     | \$2,202,899     | \$79    |
| Guyana                           | ROTARIX®  | 141,621     | 30,965     | 46      | \$223,693     | \$2,335,070     | \$2,335,070     | \$1,736 |
|                                  | ROTAVAC®  | 141,157     | 34,842     | 51      | \$251,688     | \$1,163,671     | \$1,163,671     | \$666   |
|                                  | ROTASIIL® | 141,157     | 34,842     | 51      | \$251,688     | \$1,131,805     | \$1,131,805     | \$643   |
| Haiti                            | ROTARIX®  | 1,642,083   | 380,229    | 1,557   | \$609,246     | \$27,623,504    | \$4,702,378     | \$103   |
|                                  | ROTAVAC®  | 1,271,839   | 416,461    | 1,705   | \$667,090     | \$11,013,492    | \$6,404,662     | \$132   |
|                                  | ROTASIIL® | 1,271,839   | 416,461    | 1,705   | \$667,090     | \$10,637,832    | \$6,261,230     | \$128   |
| Honduras                         | ROTARIX®  | 1,920,553   | 422,385    | 391     | \$2,083,282   | \$31,797,350    | \$31,797,350    | \$2,667 |
|                                  | ROTAVAC®  | 1,899,458   | 477,368    | 442     | \$2,354,359   | \$15,766,012    | \$15,766,012    | \$1,065 |
|                                  | ROTASIIL® | 1,899,458   | 477,368    | 442     | \$2,354,359   | \$15,334,291    | \$15,334,291    | \$1,031 |
| India                            | ROTARIX®  | 216,885,047 | 41,643,699 | 95,794  | \$106,415,765 | \$1,741,279,657 | \$1,741,279,657 | \$648   |
|                                  | ROTAVAC®  | 210,355,220 | 46,083,379 | 106,007 | \$117,772,708 | \$1,786,444,633 | \$1,786,444,633 | \$597   |
|                                  | ROTASIIL® | 210,355,220 | 46,083,379 | 106,007 | \$117,772,708 | \$1,737,518,835 | \$1,737,518,835 | \$580   |
| Indonesia                        | ROTARIX®  | 40,066,627  | 7,788,645  | 10,823  | \$37,927,779  | \$665,220,834   | \$665,220,834   | \$2,159 |
|                                  | ROTAVAC®  | 35,606,711  | 8,613,368  | 11,969  | \$41,943,398  | \$329,048,931   | \$329,048,931   | \$894   |
|                                  | ROTASIIL® | 35,606,711  | 8,613,368  | 11,969  | \$41,943,398  | \$320,037,163   | \$320,037,163   | \$866   |
| Kenya                            | ROTARIX®  | 14,630,923  | 3,225,501  | 8,877   | \$8,233,918   | \$117,831,196   | \$73,903,636    | \$283   |
|                                  | ROTAVAC®  | 14,076,582  | 3,499,623  | 9,631   | \$8,934,959   | \$119,659,458   | \$89,255,279    | \$319   |
|                                  | ROTASIIL® | 14,076,582  | 3,499,623  | 9,631   | \$8,934,959   | \$116,382,842   | \$88,065,224    | \$315   |
| Kiribati                         | ROTARIX®  | 25,503      | 5,365      | 14      | \$23,395      | \$406,410       | \$406,410       | \$1,080 |
|                                  | ROTAVAC®  | 25,002      | 5,910      | 15      | \$25,776      | \$209,627       | \$209,627       | \$471   |
|                                  | ROTASIIL® | 25,002      | 5,910      | 15      | \$25,776      | \$203,886       | \$203,886       | \$456   |
| Kyrgyzstan                       | ROTARIX®  | 1,244,976   | 450,885    | 225     | \$2,806,002   | \$9,886,628     | \$5,696,035     | \$429   |
|                                  | ROTAVAC®  | 1,219,828   | 466,414    | 232     | \$2,902,866   | \$10,203,078    | \$7,256,136     | \$625   |
|                                  | ROTASIIL® | 1,219,828   | 466,414    | 232     | \$2,902,866   | \$9,923,656     | \$7,178,955     | \$614   |
| Lao People's Democratic Republic | ROTARIX®  | 1,186,648   | 237,521    | 1,326   | \$2,217,023   | \$9,984,407     | \$8,828,923     | \$195   |
|                                  | ROTAVAC®  | 1,066,947   | 265,434    | 1,481   | \$2,476,970   | \$10,225,933    | \$9,431,407     | \$183   |
|                                  | ROTASIIL® | 1,066,947   | 265,434    | 1,481   | \$2,476,970   | \$9,945,424     | \$9,205,425     | \$177   |
| Lesotho                          | ROTARIX®  | 550,446     | 126,078    | 594     | \$403,802     | \$4,419,060     | \$2,325,045     | \$133   |
|                                  | ROTAVAC®  | 535,914     | 138,148    | 650     | \$442,508     | \$4,513,444     | \$3,055,749     | \$165   |
|                                  | ROTASIIL® | 535,914     | 138,148    | 650     | \$442,508     | \$4,389,853     | \$3,032,196     | \$164   |
| Liberia                          | ROTARIX®  | 1,481,187   | 352,291    | 1,278   | \$587,456     | \$10,701,360    | \$4,089,089     | \$106   |
|                                  | ROTAVAC®  | 1,286,451   | 386,308    | 1,402   | \$644,131     | \$9,744,094     | \$5,666,261     | \$139   |
|                                  | ROTASIIL® | 1,286,451   | 386,308    | 1,402   | \$644,131     | \$9,412,113     | \$5,539,752     | \$136   |
| Madagascar                       | ROTARIX®  | 7,244,209   | 1,622,511  | 6,370   | \$2,465,080   | \$50,490,355    | \$19,292,831    | \$102   |
|                                  | ROTAVAC®  | 6,858,150   | 1,769,058  | 6,945   | \$2,687,765   | \$47,531,205    | \$27,640,007    | \$139   |
|                                  | ROTASIIL® | 6,858,150   | 1,769,058  | 6,945   | \$2,687,765   | \$45,911,327    | \$27,022,399    | \$136   |
| Malawi                           | ROTARIX®  | 6,138,614   | 1,487,654  | 6,147   | \$3,486,309   | \$42,520,140    | \$16,247,338    | \$81    |
|                                  | ROTAVAC®  | 5,956,350   | 1,622,659  | 6,705   | \$3,802,896   | \$40,318,447    | \$23,445,330    | \$114   |
|                                  | ROTASIIL® | 5,956,350   | 1,622,659  | 6,705   | \$3,802,896   | \$38,945,043    | \$22,922,123    | \$111   |

|                       |           |            |            |        |              |               |               |         |
|-----------------------|-----------|------------|------------|--------|--------------|---------------|---------------|---------|
| Mali                  | ROTARIX®  | 6,184,258  | 1,403,622  | 7,001  | \$2,329,722  | \$44,878,632  | \$17,148,540  | \$84    |
|                       | ROTAVAC®  | 5,370,633  | 1,528,415  | 7,623  | \$2,536,699  | \$40,776,423  | \$23,712,106  | \$111   |
|                       | ROTASIIL® | 5,370,633  | 1,528,415  | 7,623  | \$2,536,699  | \$39,386,585  | \$23,182,098  | \$108   |
| Mauritania            | ROTARIX®  | 1,200,458  | 270,702    | 1,537  | \$870,930    | \$9,887,444   | \$5,457,313   | \$118   |
|                       | ROTAVAC®  | 1,083,368  | 298,162    | 1,692  | \$959,283    | \$9,801,262   | \$6,808,444   | \$136   |
|                       | ROTASIIL® | 1,083,368  | 298,162    | 1,692  | \$959,283    | \$9,532,809   | \$6,745,380   | \$135   |
| Mongolia              | ROTARIX®  | 598,514    | 229,016    | 130    | \$953,462    | \$9,477,638   | \$9,477,638   | \$2,218 |
|                       | ROTAVAC®  | 598,514    | 234,615    | 133    | \$976,855    | \$4,904,458   | \$4,904,458   | \$997   |
|                       | ROTASIIL® | 598,514    | 234,615    | 133    | \$976,855    | \$4,770,160   | \$4,770,160   | \$963   |
| Mozambique            | ROTARIX®  | 10,006,557 | 2,270,541  | 9,103  | \$4,751,912  | \$70,827,392  | \$27,063,800  | \$97    |
|                       | ROTAVAC®  | 9,083,237  | 2,496,548  | 10,009 | \$5,224,219  | \$66,153,609  | \$38,469,083  | \$132   |
|                       | ROTASIIL® | 9,083,237  | 2,496,548  | 10,009 | \$5,224,219  | \$63,899,240  | \$37,609,671  | \$128   |
| Myanmar               | ROTARIX®  | 8,362,868  | 1,789,483  | 4,287  | \$3,928,553  | \$67,119,696  | \$39,096,901  | \$315   |
|                       | ROTAVAC®  | 8,102,780  | 2,040,478  | 4,888  | \$4,479,595  | \$68,695,435  | \$49,153,966  | \$351   |
|                       | ROTASIIL® | 8,102,780  | 2,040,478  | 4,888  | \$4,479,595  | \$66,814,203  | \$48,613,815  | \$347   |
| Nepal                 | ROTARIX®  | 5,006,028  | 1,030,583  | 753    | \$1,410,178  | \$34,899,087  | \$13,335,264  | \$547   |
|                       | ROTAVAC®  | 4,864,133  | 1,116,376  | 816    | \$1,527,722  | \$33,107,970  | \$19,252,409  | \$751   |
|                       | ROTASIIL® | 4,864,133  | 1,116,376  | 816    | \$1,527,722  | \$31,980,187  | \$18,822,774  | \$733   |
| Nicaragua             | ROTARIX®  | 1,092,186  | 384,373    | 460    | \$1,507,347  | \$18,081,624  | \$16,747,246  | \$1,186 |
|                       | ROTAVAC®  | 1,076,241  | 398,380    | 477    | \$1,562,399  | \$8,987,481   | \$8,657,343   | \$533   |
|                       | ROTASIIL® | 1,076,241  | 398,380    | 477    | \$1,562,399  | \$8,741,357   | \$8,433,875   | \$516   |
| Niger                 | ROTARIX®  | 8,811,793  | 2,098,720  | 19,320 | \$3,657,328  | \$63,969,987  | \$24,443,523  | \$43    |
|                       | ROTAVAC®  | 7,564,498  | 2,292,625  | 21,106 | \$3,995,130  | \$57,772,728  | \$33,595,212  | \$56    |
|                       | ROTASIIL® | 7,564,498  | 2,292,625  | 21,106 | \$3,995,130  | \$55,804,490  | \$32,845,221  | \$55    |
| Nigeria               | ROTARIX®  | 41,627,190 | 9,756,871  | 84,218 | \$26,096,216 | \$352,784,094 | \$270,241,552 | \$120   |
|                       | ROTAVAC®  | 35,492,367 | 10,650,771 | 91,934 | \$28,485,738 | \$342,230,664 | \$287,705,916 | \$116   |
|                       | ROTASIIL® | 35,492,367 | 10,650,771 | 91,934 | \$28,485,738 | \$332,854,877 | \$282,072,023 | \$114   |
| Pakistan              | ROTARIX®  | 37,967,843 | 8,098,797  | 23,446 | \$12,209,306 | \$308,853,983 | \$222,737,186 | \$343   |
|                       | ROTAVAC®  | 35,797,028 | 8,801,555  | 25,481 | \$13,268,537 | \$312,302,252 | \$252,993,069 | \$359   |
|                       | ROTASIIL® | 35,797,028 | 8,801,555  | 25,481 | \$13,268,537 | \$303,748,817 | \$248,509,872 | \$353   |
| Papua New Guinea      | ROTARIX®  | 1,797,367  | 399,995    | 1,038  | \$1,281,048  | \$14,920,903  | \$14,150,660  | \$479   |
|                       | ROTAVAC®  | 1,607,485  | 441,152    | 1,145  | \$1,412,872  | \$14,741,493  | \$14,223,924  | \$432   |
|                       | ROTASIIL® | 1,607,485  | 441,152    | 1,145  | \$1,412,872  | \$14,337,773  | \$13,855,723  | \$420   |
| Republic of Moldova   | ROTARIX®  | 319,744    | 114,889    | 9      | \$827,754    | \$2,576,006   | \$2,576,006   | \$3,433 |
|                       | ROTAVAC®  | 310,551    | 118,846    | 10     | \$856,349    | \$2,629,527   | \$2,629,527   | \$3,365 |
|                       | ROTASIIL® | 310,551    | 118,846    | 10     | \$856,349    | \$2,557,521   | \$2,557,521   | \$3,229 |
| Rwanda                | ROTARIX®  | 3,585,413  | 715,749    | 2,539  | \$2,031,404  | \$24,601,057  | \$9,419,779   | \$112   |
|                       | ROTAVAC®  | 3,567,212  | 772,472    | 2,741  | \$2,192,822  | \$23,604,645  | \$13,750,810  | \$162   |
|                       | ROTASIIL® | 3,567,212  | 772,472    | 2,741  | \$2,192,822  | \$22,800,584  | \$13,440,397  | \$158   |
| Sao Tome and Principe | ROTARIX®  | 66,365     | 13,923     | 25     | \$156,108    | \$525,494     | \$439,991     | \$428   |
|                       | ROTAVAC®  | 66,017     | 15,146     | 27     | \$169,848    | \$542,339     | \$482,195     | \$433   |
|                       | ROTASIIL® | 66,017     | 15,146     | 27     | \$169,848    | \$527,488     | \$471,471     | \$418   |
| Senegal               | ROTARIX®  | 5,356,154  | 1,078,428  | 3,025  | \$3,505,164  | \$36,891,487  | \$14,096,578  | \$134   |
|                       | ROTAVAC®  | 5,241,869  | 1,174,071  | 3,293  | \$3,816,223  | \$35,205,747  | \$20,472,319  | \$194   |
|                       | ROTASIIL® | 5,241,869  | 1,174,071  | 3,293  | \$3,816,223  | \$34,006,423  | \$20,015,378  | \$188   |
| Sierra Leone          | ROTARIX®  | 2,237,531  | 494,152    | 4,068  | \$1,096,614  | \$15,995,382  | \$6,111,983   | \$51    |
|                       | ROTAVAC®  | 2,034,879  | 542,830    | 4,469  | \$1,204,550  | \$14,848,401  | \$8,634,480   | \$69    |
|                       | ROTASIIL® | 2,034,879  | 542,830    | 4,469  | \$1,204,550  | \$14,342,464  | \$8,441,648   | \$67    |
| Solomon Islands       | ROTARIX®  | 170,828    | 36,041     | 32     | \$163,413    | \$1,354,672   | \$1,220,651   | \$1,186 |
|                       | ROTAVAC®  | 168,506    | 39,695     | 35     | \$179,991    | \$1,401,486   | \$1,307,173   | \$1,148 |

|                             |           |            |           |        |              |               |               |         |
|-----------------------------|-----------|------------|-----------|--------|--------------|---------------|---------------|---------|
|                             | ROTASIIL® | 168,506    | 39,695    | 35     | \$179,991    | \$1,363,103   | \$1,275,262   | \$1,116 |
| Somalia                     | ROTARIX®  | 3,098,083  | 723,053   | 6,774  | \$846,259    | \$22,315,011  | \$8,526,772   | \$46    |
|                             | ROTAVAC®  | 2,731,238  | 791,252   | 7,413  | \$926,056    | \$20,377,550  | \$11,849,677  | \$60    |
| South Sudan                 | ROTASIIL® | 2,731,238  | 791,252   | 7,413  | \$926,056    | \$19,683,313  | \$11,585,139  | \$58    |
|                             | ROTARIX®  | 1,380,059  | 331,863   | 2,167  | \$564,120    | \$10,148,222  | \$3,877,729   | \$61    |
|                             | ROTAVAC®  | 1,160,690  | 362,015   | 2,364  | \$615,357    | \$9,089,747   | \$5,285,746   | \$79    |
| Sri Lanka                   | ROTASIIL® | 1,160,690  | 362,015   | 2,364  | \$615,357    | \$8,780,072   | \$5,167,745   | \$77    |
|                             | ROTARIX®  | 2,895,874  | 1,298,752 | 68     | \$4,874,860  | \$46,092,520  | \$46,092,520  | \$8,690 |
|                             | ROTAVAC®  | 2,868,156  | 1,315,209 | 69     | \$4,936,522  | \$23,848,677  | \$23,848,677  | \$3,938 |
| Sudan                       | ROTASIIL® | 2,868,156  | 1,315,209 | 69     | \$4,936,522  | \$23,195,577  | \$23,195,577  | \$3,802 |
|                             | ROTARIX®  | 12,845,274 | 2,833,307 | 14,567 | \$8,823,965  | \$103,124,331 | \$77,184,096  | \$184   |
|                             | ROTAVAC®  | 12,263,663 | 3,120,170 | 16,041 | \$9,716,887  | \$105,559,187 | \$87,496,743  | \$190   |
| Tajikistan                  | ROTASIIL® | 12,263,663 | 3,120,170 | 16,041 | \$9,716,887  | \$102,667,745 | \$85,844,880  | \$186   |
|                             | ROTARIX®  | 2,291,676  | 515,367   | 1,320  | \$995,629    | \$18,273,646  | \$10,308,538  | \$265   |
|                             | ROTAVAC®  | 2,233,694  | 567,532   | 1,454  | \$1,096,436  | \$18,809,006  | \$13,222,459  | \$314   |
| Timor-Leste                 | ROTASIIL® | 2,233,694  | 567,532   | 1,454  | \$1,096,436  | \$18,293,874  | \$13,090,717  | \$310   |
|                             | ROTARIX®  | 418,352    | 90,188    | 220    | \$695,130    | \$6,785,755   | \$6,785,755   | \$1,047 |
|                             | ROTAVAC®  | 391,577    | 99,103    | 242    | \$763,884    | \$3,416,235   | \$3,416,235   | \$415   |
| Togo                        | ROTASIIL® | 391,577    | 99,103    | 242    | \$763,884    | \$3,322,673   | \$3,322,673   | \$400   |
|                             | ROTARIX®  | 2,416,422  | 540,639   | 3,061  | \$1,293,933  | \$16,683,379  | \$6,374,873   | \$67    |
|                             | ROTAVAC®  | 2,356,941  | 589,551   | 3,338  | \$1,411,080  | \$15,873,336  | \$9,230,409   | \$94    |
| Uganda                      | ROTASIIL® | 2,356,941  | 589,551   | 3,338  | \$1,411,080  | \$15,332,620  | \$9,024,415   | \$91    |
|                             | ROTARIX®  | 15,696,079 | 3,497,987 | 9,314  | \$7,773,885  | \$110,814,276 | \$42,343,158  | \$146   |
|                             | ROTAVAC®  | 14,018,297 | 3,903,689 | 10,394 | \$8,674,297  | \$103,141,041 | \$59,977,570  | \$194   |
| Ukraine                     | ROTASIIL® | 14,018,297 | 3,903,689 | 10,394 | \$8,674,297  | \$99,626,456  | \$58,637,889  | \$189   |
|                             | ROTARIX®  | 1,136,251  | 685,509   | 35     | \$3,871,135  | \$24,329,758  | \$24,329,758  | \$8,456 |
|                             | ROTAVAC®  | 630,398    | 692,799   | 35     | \$3,911,990  | \$10,580,689  | \$10,580,689  | \$2,728 |
| United Republic of Tanzania | ROTASIIL® | 630,398    | 692,799   | 35     | \$3,911,990  | \$10,290,365  | \$10,290,365  | \$2,609 |
|                             | ROTARIX®  | 22,592,798 | 5,235,956 | 12,673 | \$12,913,994 | \$154,758,157 | \$66,128,551  | \$160   |
|                             | ROTAVAC®  | 22,333,962 | 5,747,996 | 13,912 | \$14,178,194 | \$148,109,240 | \$94,941,109  | \$221   |
| Uzbekistan                  | ROTASIIL® | 22,333,962 | 5,747,996 | 13,912 | \$14,178,194 | \$143,064,043 | \$91,549,924  | \$212   |
|                             | ROTARIX®  | 5,772,626  | 1,169,250 | 747    | \$2,809,315  | \$45,978,443  | \$45,978,443  | \$1,979 |
|                             | ROTAVAC®  | 5,649,493  | 1,296,604 | 828    | \$3,115,241  | \$47,567,256  | \$47,567,256  | \$1,837 |
| Viet Nam                    | ROTASIIL® | 5,649,493  | 1,296,604 | 828    | \$3,115,241  | \$46,264,496  | \$46,264,496  | \$1,784 |
|                             | ROTARIX®  | 14,299,616 | 4,434,155 | 1,924  | \$42,052,345 | \$141,769,165 | \$141,769,165 | \$1,658 |
|                             | ROTAVAC®  | 14,251,963 | 4,522,533 | 1,963  | \$42,895,925 | \$161,291,552 | \$161,291,552 | \$1,930 |
| Yemen                       | ROTASIIL® | 14,251,963 | 4,522,533 | 1,963  | \$42,895,925 | \$157,162,880 | \$157,162,880 | \$1,862 |
|                             | ROTARIX®  | 6,182,800  | 1,383,818 | 5,075  | \$2,560,785  | \$62,941,149  | \$42,007,560  | \$303   |
|                             | ROTAVAC®  | 5,888,548  | 1,516,019 | 5,560  | \$2,805,409  | \$69,972,295  | \$55,462,773  | \$369   |
| Zambia                      | ROTASIIL® | 5,888,548  | 1,516,019 | 5,560  | \$2,805,409  | \$68,509,341  | \$54,995,570  | \$365   |
|                             | ROTARIX®  | 6,573,203  | 1,560,484 | 6,263  | \$4,279,137  | \$66,609,961  | \$45,525,340  | \$259   |
|                             | ROTAVAC®  | 6,189,033  | 1,702,154 | 6,831  | \$4,667,364  | \$73,713,622  | \$59,159,941  | \$313   |
| Zimbabwe                    | ROTASIIL® | 6,189,033  | 1,702,154 | 6,831  | \$4,667,364  | \$72,204,031  | \$58,649,132  | \$311   |
|                             | ROTARIX®  | 4,669,296  | 1,044,688 | 4,766  | \$2,768,787  | \$41,811,906  | \$21,871,830  | \$159   |
|                             | ROTAVAC®  | 4,564,281  | 1,139,997 | 5,201  | \$3,021,715  | \$44,866,828  | \$32,015,344  | \$222   |
|                             | ROTASIIL® | 4,564,281  | 1,139,997 | 5,201  | \$3,021,715  | \$43,819,959  | \$31,616,030  | \$218   |

\* Discounted value
